# Supplementary material
Source: publisher figshare collection journal article supplement (https://karger.figshare.com/articles/dataset/_/3465530)
Supplement: Supplementary file 1 [file 1]

# BEaRSS Study

Patient Number:

Study A or B:

NAMBOUR INTENSIVE CARE UNIT

PATIENT STICKER

## BEaRSS CRRT (Haemofilter) ORDER FORM

Step 1: Order & program CVVH with Predilution only

Step 2: Guide to Predilution fluid **POTASSIUM** concentration:

**NB:** Baxter Citrate research solution is supplied with 1mmol/L K<sup>+</sup> (5 mmol / 5L). Add KCL as needed

| Serum Potassium | <b>Total KCL</b> in Bag | Final concentration of K <sup>+</sup> |
|-----------------|-------------------------|---------------------------------------|
| >5.5            | 5 mmol / 5L Bag         | 1mmol / L (DO NOT add KCL)            |
| >4.5 and <5.5   | 15 mmol / 5L Bag        | 3mmol / L                             |
| >3.5 and <4.5   | 20 mmol / 5L Bag        | 4mmol / L                             |
| >2.5 and <3.5   | 25 mmol / 5L Bag        | 5mmol / L                             |

Step 3: Order **BEaRSS CVVH** prescription – ensure citrate is not contraindicated by:

Fulminant liver failure with lactate  $\geq$  4mmol/L

Child's C liver disease

|                                        |      |      |      |      |      |
|----------------------------------------|------|------|------|------|------|
| Date                                   |      |      |      |      |      |
| Time of order                          |      |      |      |      |      |
| Medical Officer Signature              |      |      |      |      |      |
| MODE                                   | CVVH | CVVH | CVVH | CVVH | CVVH |
| Total K <sup>+</sup> /Bag (see step 2) |      |      |      |      |      |
| Predilution Rate (ml/hr) <b>BEaRSS</b> | 2000 | 2000 | 2000 | 2000 | 2000 |
| Target Blood Flow Rate (ml/min)        | 200  | 200  | 200  | 200  | 200  |
| Fluid loss rate (mls/hr)               |      |      |      |      |      |
| Nursing Staff Check Initials (AM/PM/N) |      |      |      |      |      |

Step 4: Adjust Calcium / Magnesium infusion rate in mls/hr – given via patient's CVC / PICC only

Calcium Chloride 4.9% + Magnesium Chloride 3.4% in 500 mls (**hypertonic**)

(500mls contains 24.5 gm calcium chloride / 166mmol Ca<sup>++</sup> (0.333mmol/ml))

1. Start Calcium / Magnesium infusion at 15ml/hr, **10 minutes before** starting filter
2. Check ionised calcium on ABG from patient **arterial line** at 30 minutes and 60 minutes after CVVH commencement (only adjust infusion rate at 30 minutes if within red zone).
3. After 60 minute check, adjust Calcium / Magnesium infusion as per table below:

| Target ionised Calcium on ABG                                    | < 0.90 mmol/L                                        | 0.90 -1.00 mmol/L              | 1.01 -1.20 mmol/L  | 1.21 -1.40 mmol/L              | > 1.40 mmol/L                                   |
|------------------------------------------------------------------|------------------------------------------------------|--------------------------------|--------------------|--------------------------------|-------------------------------------------------|
| Alteration needed to Calcium / Magnesium infusion rate in mls/hr | <b>Urgent<br/>Notify medical officer immediately</b> | Increase infusion by 1.5mls/hr | No change          | Decrease infusion by 1.5mls/hr | <b>Stop infusion<br/>Notify medical officer</b> |
| ABG timing                                                       | Recheck within 1 hour                                | Recheck within 1 hour          | Recheck at 6 hours | Recheck within 1 hour          | Recheck within 1 hour                           |

4. If ionised calcium is <0.9 mmol/L or patient is symptomatic medical officer must review – consider order for bolus IV calcium chloride 10mls
5. Check coagulation profile, magnesium level and total calcium level at 0500 & 1700 daily

**NB: Never infuse calcium/magnesium solution into the filter circuit.**

**NB: Patient must be monitored for signs & symptoms of citrate toxicity – see page 2**

**Call Consultant on call if you have any questions or are considering variations of the above.**

Version 1.0 25<sup>th</sup> July 2012

## ***BEaRSS Study***

NAMBOUR INTENSIVE CARE UNIT

PATIENT STICKER

**NB: Potential complications / signs of citrate accumulation**

**All suspected toxicity must be reported to ICU Consultant**

**Patients with significant liver impairment are at risk.**

Increasing calcium requirements  
Increasing magnesium requirements

Arrhythmias  
Coagulopathy

Ionised calcium on ABG below 0.9mmol/L  
Increasing total to ionised calcium ratio of >2.1:1

Fitting  
Weakness

Anion Gap increasing by 5mmol/l since last ABG  
Worsening metabolic acidosis or metabolic alkalosis
