# Supplementary material
Source: publisher figshare collection journal article supplement (https://karger.figshare.com/articles/dataset/_/3465530)
Supplement: Supplementary file 2 [file 1]

Archive with 2 entries (2 files):
- BPU_201602010_1_3_Appendix_2.pdf
- BPU_201602010_1_4_Appendix_1.pdf
