# Supplementary material
Source: publisher figshare collection journal article supplement (https://karger.figshare.com/articles/dataset/_/3465530)
Supplement: Supplementary file 2 [file 1 › BPU_201602010_1_4_Appendix_1.pdf]

APPENDIX 1: Chemical composition of the two hemofiltration solutions.

| <i>Constituents</i>          | <i>Standard Solution</i> | <i>Experimental Solution</i> |
|------------------------------|--------------------------|------------------------------|
|                              | <i>( C18 )</i>           | <i>( C15 )</i>               |
| Sodium                       | 152.0 mmol/l             | 143.0 mmol/l                 |
| Potassium                    | 1.0 mmol/l               | 1.0 mmol/l                   |
| Chloride                     | 99.0 mmol/l              | 99.0 mmol/l                  |
| Citrate                      | 18 mmol/l                | 15 mmol/l                    |
| <i>Calculated parameters</i> |                          |                              |
| HF-SIDa                      | 54 meq/l                 | 45 meq/l                     |
| Osmolality                   | 270 mOsm/kg              | 258 mOsm/kg                  |
| pH range                     | 5.0 – 6.5                | 5.0 – 7.5                    |

The HF apparent strong ion difference(HF-SIDa) calculated as  $[Na^+] + [K^+] - [Cl^-]$ .  
Citrate was treated as a weak acid.
